# Supplementary material for: SHAKTI: Subglacial Hydrology and Kinetic, Transient Interactions v1.0
Source: Copernicus journal article supplement (doi:10.5194/gmd-11-2955-2018), 2018-07-24
Supplement: Supplementary file [file gmd-11-2955-2018-supplement-title-page.pdf › gmd-11-2955-2018-supplement-title-page.pdf]

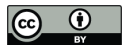

## *Supplement of*

# **SHAKTI: Subglacial Hydrology and Kinetic, Transient Interactions v1.0**

**Aleah Sommers et al.**

*Correspondence to:* Aleah Sommers ([aleah.sommers@colorado.edu](mailto:aleah.sommers@colorado.edu))

- [gmd-11-2955-2018-supplement-title-page.pdf](#)
- [SI\\_seasonal\\_animation.mov](#)

The copyright of individual parts of the supplement might differ from the CC BY 4.0 License.
